# Supplementary figures and images for: Association between busulfan exposure and survival in patients undergoing a CD34+ selected stem cell transplantation
Source: PubMed Central journal article supplement — Blood Adv. 2023 Jun 30;7(18):5225–33. doi: 10.1182/bloodadvances.2023009708 (PMC10500467; doi:10.1182/bloodadvances.2023009708), 2023-06-30

Figure 1a: Relapse

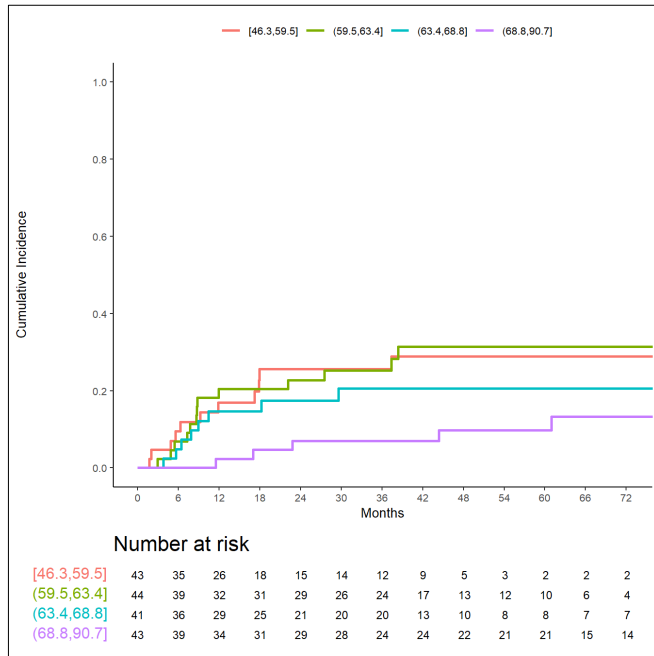

Figure 1b: Day 100 acute GVHD

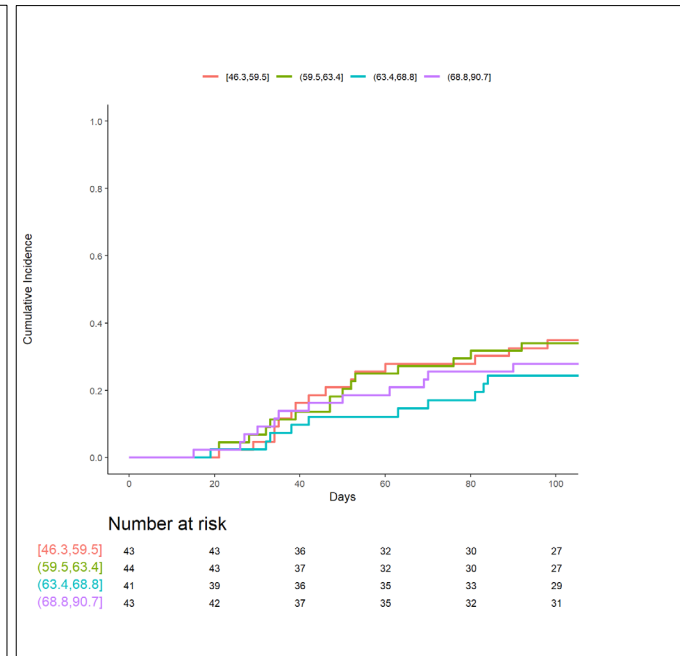

Supplement: BLOODA_ADV-2023-009708-mmc1.pdf [file BLOODA_ADV-2023-009708-mmc1.pdf]
